# Supplementary material for: Different ratios of DHA/EPA reverses insulin resistance by improving adipocyte dysfunction and lipid disorders in HFD-induced IR mice
Source: Royal Society of Chemistry journal article supplement (doi:10.1039/d2fo02686d), 2022-12-12
Supplement: d2fo02686d1.zip [file d2fo02686d1.zip]

## Sheet: Fig1（A-C)
Fig1 (A) the change of food intake
	Food intake（g/day/mouse）		CON group				Food intake（g/day/mouse）							HFD group
	CON1	CON2	mean	SD			HFD1	HFD2	HFD3	HFD4	HFD5	HFD6	HFD7	mean	SD
Week1	2.64066	2.88132	2.76099	0.170172		Week1	2.53407	2.54066	2.55934	2.46044	2.6044	2.36374	2.49231	2.50785	0.0785219
Week2	2.775	2.85769	2.81635	0.0584723		Week2	2.36058	2.44808	2.29808	2.40288	2.37019	2.3	2.37019	2.36429	0.053402
Week3	2.75	2.98974	2.86987	0.169524		Week3	2.53462	2.52564	2.49359	2.54103	2.55641	2.4	2.46282	2.50201	0.0549483
Week4	2.88462	2.98022	2.93242	0.0676025		Week4	2.67033	2.61538	2.67363	2.58791	2.63736	2.44945	2.47253	2.58666	0.091117
Week5	2.79135	2.97981	2.88558	0.133262		Week5	2.41538	2.53365	2.52308	2.62212	2.49615	2.46731	2.48365	2.50591	0.0643475
Week6	2.76154	2.85288	2.80721	0.0645915		Week6	2.69327	2.63654	2.7749	2.6149	2.52615	2.48558	2.63894	2.62433	0.097269
Week7	2.82821	3.07564	2.95192	0.174964		Week7	2.83077	2.85641	2.91923	2.69872	2.75128	2.56026	2.68718	2.75769	0.121554
Week8	2.72436	2.85897	2.79167	0.0951875		Week8	2.58205	2.53333	2.63077	2.60128	2.40385	2.48077	2.58846	2.54579	0.0795482
Week9	2.60385	3.03077	2.81731	0.30188		Week9	2.65513	2.52308	2.68462	2.51026	2.67821	2.38974	2.30513	2.53516	0.148334
Week10	2.73942	2.99519	2.86731	0.180856		Week10	2.63558	2.56538	2.62019	2.46442	2.61635	2.34327	2.55865	2.54341	0.105452
Week11	2.95897	3.03333	2.99615	0.0525797		Week11	2.54744	2.57051	2.69231	2.48846	2.73333	2.29231	2.45641	2.54011	0.148636
Week12	2.74327	2.87596	2.80962	0.0938276		Week12	2.43365	2.84615	2.74231	2.71442	2.90192	2.61923	2.72115	2.71126	0.153381
Week13	2.84904	2.89135	2.87019	0.0299161		Week13	2.62692	2.75865	2.75192	2.83077	2.78846	2.575	2.87788	2.74423	0.107994
Week14	2.88974	2.85	2.86987	0.028103		Week14	2.7141	2.7641	2.82949	2.72821	2.73333	2.74103	2.78333	2.75623	0.0397465
Week15	2.40192	2.58173	2.49183	0.127143		Week15	2.52404	2.50481	2.62692	2.54615	2.48942	2.11923	2.54423	2.47926	0.164764
Week16	2.54808	2.76731	2.65769	0.15502		Week16	2.02692	2.29423	2.62692	2.44423	2.15192	2.63077	2.50769	2.38324	0.233899
Fig1(B)food intake between CON and HFD
	Food intake（g/day/mouse）
	Week1	Week2	Week3	Week4	Week5	Week6	Week7	Week8	Week9	Week10	Week11	Week12	Week13	Week14	Week15	Week16	mean	SD
CON	2.76099	2.81635	2.86987	2.93242	2.88558	2.80721	2.95192	2.79167	2.81731	2.86731	2.99615	2.80962	2.87019	2.86987	2.85	2.65769	2.84713	0.0796427
HFD	2.50785	2.36429	2.50201	2.58666	2.50591	2.62433	2.75769	2.54579	2.53516	2.54341	2.58141	2.71126	2.74423	2.75623	2.47926	2.38324	2.57055	0.122231
Fig1(C)Energy intake per mouse a day after 16-week feeding
	Energy intake（kcal/day/mouse)
	Week1	Week2	Week3	Week4	Week5	Week6	Week7	Week8	Week9	Week10	Week11	Week12	Week13	Week14	Week15	Week16	mean	SD
CON（3.85kcal/g）	10.6298	10.8429	11.049	11.2898	11.1095	10.8078	11.3649	10.7479	10.8466	11.0391	11.5352	10.817	11.0502	11.049	10.9725	10.2321	10.9615	0.306624
HFD（4.73kcal/g）	11.8621	11.1831	11.8345	12.2349	11.8529	12.4131	13.0439	12.0416	11.9913	12.0303	12.2101	12.8243	12.9802	13.037	11.7269	11.2727	12.1587	0.578152

## Sheet: Fig1(D-E)
Fig1(D) The change of body weight																				Fig1 (E)Body weight gain after 16-week HFD or CON feeding
		body weight (g）
Group	ID	week0	week1	week2	week3	week4	week5	week6	week7	week8	week9	week10	week11	week12	week13	week14	week15	week16		Group	ID	BW gain（g）
CON1	1	18.5	20.3	21.2	21.2	21.6	22.3	23	23.4	23	23.4	23.2	24.1	24.1	25.6	25.6	26.65	25.8		CON1	1	7.3
	2	20.1	21.8	23.7	23.7	22.6	24.7	25.5	24.8	25	25.3	25	25.6	26.1	25.9	27.4	26.82	27.4			2	7.3
	3	20.5	21.9	23.7	24.4	24.6	25.6	26.1	25.5	26.1	26.7	26.3	27.2	27	27	27.2	/	26.5			3	6
	4	20.8	23.2	25.8	27.7	27.1	28.9	30	29.7	30.6	31.5	31.1	33.9	33.6	33.9	35.2	35.06	33.2			4	12.4
	5	20.3	23.1	26	28.2	29.8	30.6	32.2	32.7	32.7	33.6	31.9	33.8	33.5	35	34.7	35.06	33.8			5	13.5
	6	20.8	22.7	25.3	26.7	25.8	28.6	29.8	29.9	30.5	31.3	30	31.6	30.8	31	31.2	31.15	31.3			6	10.5
	7	21.3	21.7	22.5	22.8	23.4	24.8	24.9	24	24.1	24.9	24.3	24.5	24.3	25.1	24.7	25.56	25			7	3.7
	8	21.2	22.7	24	24.6	23.6	25.5	27.3	27.1	26.5	26.8	25.8	27.4	27.2	28.9	28.5	28.24	27.3			8	6.1
	9	21	22.5	23.9	24.5	23.4	25.6	26.7	26.9	27.4	28.5	27.3	29.1	29.5	30	31.3	30.05	30.2			9	9.2
	10	22	24.3	26.9	28.7	29.1	29.7	32.2	31.4	31.7	32	32	33.3	33	34.5	35.6	35.24	34.9			10	12.9
	11	22.3	24.6	26.3	26.7	28.3	28.1	29.5	29.6	29.6	29.1	28.1	29.9	31.1	32	32	32.68	32.6			11	10.3
	12	23.2	25.3	27.5	29.1	30	30.5	32	31.4	31.7	32.7	32.7	34.3	34.9	35	35.7	35.43	33.8			12	10.6
CON2	1	18.3	22.1	24.6	26.1	27.9	26.7	26.8	27.5	28.7	28.7	28.3	29.3	28.8	28.5	28.3	27.98	28.3		CON2	1	10
	2	19.9	22.4	24	24.9	24.7	26.3	27.5	25.8	28.2	28.9	28.4	29.5	29.1	29.1	30	29.84	29.8			2	9.9
	3	20.8	23.3	24.9	25.4	28.8	27.5	27.7	27.9	29	29.6	29.36	29.8	29.9	29.4	30.5	30.33	30.6			3	9.8
	4	20.5	22.8	24.7	26	24.2	26.3	26.9	27.2	29.4	28.9	28.1	29.2	29.7	28.6	27.9	28.14	28.6			4	8.1
	5	20.5	24.1	23.5	24.5	25.8	26	27.2	27.2	27.7	28.2	28.1	28.7	29.2	28.7	29	29.35	28.6			5	8.1
	6	20.6	23.2	25.3	26.7	27.2	27.1	28.2	28.3	29	29.6	29.2	30.6	30.8	30.7	30.9	31.02	30.3			6	9.7
	7	21.7	23.7	26	27.5	27.4	29.6	29.5	29.8	31.1	32.1	31.2	32.2	31.7	31.9	31	32.01	31.3			7	9.6
	8	21.8	23	24.1	24.7	24	26.5	26.8	26.9	27.8	28.4	27.8	28.2	28.9	28.7	29.4	29.13	28.3			8	6.5
	9	21.4	23.1	24.9	25.9	28.1	26.8	27	27.7	27.3	28.6	27.9	29	28.6	29	29.2	29.49	29.2			9	7.8
	10	22.8	24.8	27.5	29.1	29.3	30.5	31.4	30	32.3	32.5	32.2	33.5	33.5	33	33.8	34.34	33.9			10	11.1
	11	22.3	24.3	24.9	25.9	26.2	27.8	28.1	28.4	29	29.5	29.4	29.6	29.3	28.9	29.1	28.91	29.3			11	7
	12	23.2	25.5	27	28.5	27.4	30.1	30.6	29	31.5	32.2	31.6	32.8	32.4	33.8	34.6	34.24	32.9			12	9.7
	mean	21.075	23.1833	24.925	25.9792	26.2625	27.3375	28.2042	28.0042	28.7458	29.2917	28.7192	29.8792	29.875	30.175	30.5333	30.727	30.1208			mean	9.04583
	sd	1.24525	1.23488	1.54786	2.0332	2.45141	2.16108	2.4057	2.34159	2.58406	2.63701	2.59487	2.90337	2.85509	2.93869	3.13017	3.02147	2.77285			sd	2.34335
HFD1	1	18.2	22.1	24	26.4	28.8	29.2	32	33.7	35.6	37.2	37.1	37.7	37.6	38.1	39.5	40.34	38.4		HFD1	1	20.2
	2	19.8	23.7	25.2	25.4	27.5	29.3	31.2	33.3	34.7	35.4	35.2	36.7	37.4	38.6	39.7	40.99	39.4			2	19.6
	3	20.5	23	26.1	27.9	29.2	30.2	31.8	33.1	35.1	35.2	35.4	36.6	35.6	36	38	39	36.8			3	16.3
	4	20.2	23.1	25.4	27.2	28.5	29.6	31	31.5	32.7	33.7	33.5	35	35.9	37.6	37.5	37.27	36.9			4	16.7
	5	21.9	23.8	24.7	26.4	28.9	29.5	31.5	31.8	34	35.6	36.4	37.4	36.8	37.4	39	39.75	38.8			5	16.9
	6	21.3	23.5	25.5	26.7	29	30.4	31.9	33.1	35	35.4	35.5	37	36.9	38.1	40	42.21	40.6			6	19.3
	7	21.7	25.1	27.6	29.9	30.4	31.5	33.4	33.8	36	37.1	37	38.3	37.5	38.6	40.1	40.29	38.5			7	16.8
	8	21.3	25.6	27.7	29.9	32	33.1	35.7	37.8	39	40.8	40.6	41.4	41.9	43	44.7	45.9	40			8	18.7
	9	22.2	25.6	27.7	29.1	30.4	31.3	33.8	33.6	34.9	35.3	35.5	36.2	35.1	35.4	37.3	38.36	36.6			9	14.4
	10	22.3	24.8	27.7	27.8	30	30	32.2	33.5	35.1	36.1	36.3	37.9	37.4	38.5	39.5	40.42	38.9			10	16.6
	11	19.7	25.8	28	28.7	30.6	31.7	33.5	34.8	35.3	36.4	37	38.5	38	39	40.7	41.74	40.1			11	20.4
	12	18.8	25	28.5	28.3	32.2	33.6	35.2	35.5	38.2	38.4	38	39.7	41.7	43.1	45.6	47.23	46.6		HFD2	12	27.8
HFD2	1	19.7	23	25.4	25.5	27	29.1	31.1	32.6	33.8	34.8	34.5	35	36.4	38.1	38.5	39.32	38.1			1	18.4
	2	20.1	22.3	24.2	25.5	26.9	28	29.8	30.5	32	31.7	31.2	33.1	34.9	38.3	40.8	40.57	40.7			2	20.6
	3	20.1	23.1	25.3	27.1	28.4	29.3	30.9	32.6	33.7	33.8	33.4	35	36.4	38.3	38.5	39.7	39			3	18.9
	4	20.3	23.9	27.1	26.5	30.7	32.3	34.2	35.3	36.8	37.5	38	40.1	41.3	44	45.4	47.3	45.7			4	25.4
	5	20.6	23.9	27.2	29.4	31.6	33.9	35.5	37.8	39.6	39.6	39.6	42.1	43.4	46.6	47.3	48.27	46.4			5	25.8
	6	21.7	24.4	26.6	28.6	28.8	30.3	31.3	32.4	33.7	33.2	32.7	33.6	34.2	35	36.4	38.61	38.1			6	16.4
	7	21.1	23.2	25.3	27.1	28.7	29.7	32	33.1	33.9	34.5	35.7	36.6	37.7	39.5	41.4	42.27	41.8			7	20.7
	8	21.6	25	28.2	28.2	30.9	31	32.2	32.3	35.1	35.6	35	36.7	37.3	39.7	41.3	42.06	41			8	19.4
	9	21	24.4	26.8	29.4	31.6	33.4	34.9	37	38.1	38.3	38.5	39.8	41.5	42.5	43.7	44.57	43.6			9	22.6
	10	22.8	25.2	27.7	27.8	30.3	31	33.2	34.4	36.4	36.9	36.9	38.1	39.9	41.6	43	43.05	42.6			10	19.8
	11	22.4	25.8	27.9	28	31.4	31.3	33.2	35.1	37.4	38.2	38.5	40	41.7	44	45.9	47.76	45.6			11	23.2
	12	22.8	25.6	27.9	28	31.3	33.6	35.1	37.8	39.4	39.7	39.6	41.5	42.6	45	45.9	47.36	46.7			12	23.9
HFD3	1	18.4	23.5	26	27.4	28.7	29.7	31.4	32.5	33.3	34.2	33.7	35.4	36.7	37.2	37.2	38.02	36.3		HFD3	1	17.9
	2	19.8	24	26.4	28.9	27.1	29.2	31.5	33.1	32.8	33.8	33.3	34.5	35.1	35.6	35.2	34.77	35.7			2	15.9
	3	20.4	22.7	23.5	25.3	24.5	27.1	28.3	32.2	32.5	32.4	31.9	33.2	34.3	34.9	35.7	36.04	35.9			3	15.5
	4	20.6	23.9	26.3	28.6	26.3	28.6	30.1	31.1	31.9	32	32.7	33.1	34.5	35.4	36.4	36.7	36.6			4	16
	5	21.1	24.1	26.2	30.4	30.8	33.2	36.1	39.2	41.2	42.2	42.3	43.8	46	47.4	48.7	49.06	48.3			5	27.2
	6	21.6	24.4	26.9	30.5	28.9	31.6	32.7	34	35.9	36.4	35.9	36	37.8	39.5	40.9	42.15	40.7			6	19.1
	7	21.5	24.2	26.3	27.9	27.4	29.1	30.9	32	32.7	33.8	33.8	35.5	37.3	38.3	38.8	39.8	38.2			7	16.7
	8	21.4	24.7	26	29.6	30	31.1	32.7	34.8	35.5	36.5	36.4	36.6	36.4	38.2	41.1	41.92	41.3			8	19.9
	9	21.9	25.2	27.7	29.4	31.8	32.9	34.2	35.5	37.2	38	37.8	39.3	40.3	42.3	43.1	43.95	43.5			9	21.6
	10	22.2	25.7	27.6	31.1	28.6	30.7	32.2	33.3	35.1	35.5	35.7	37.1	38.5	39.8	40	41.43	40.8			10	18.6
	11	22.1	25.3	27.7	30.5	33.7	35.7	37.8	40.9	42.6	41.5	41.8	42.7	45.2	46.5	48.7	49.44	48.9			11	26.8
	12	22.8	25.8	28.1	30.2	31	33.1	35.5	37.1	37.9	38.8	38.5	40.3	41.6	42.9	44.7	46.13	45.2			12	22.4
HFD4	1	18.4	22.6	25.1	26.3	miss	28.5	29.5	30.5	31.3	30.7	30.9	32.2	32.3	33.2	34	33.21	33.7		HFD4	1	15.3
	2	19	22.3	26.1	27.5	27.4	30.2	32.3	33.7	36.2	37.8	37.4	39.2	40.2	40.9	42.8	43	43.1			2	24.1
	3	20.5	22.6	25.4	27.4	29.3	31.4	33.3	34.2	36.6	37.5	37.4	38.8	40.4	42.3	43.8	45.4	45.6			3	25.1
	4	20.5	23	25.4	26.5	27.1	27.8	28.8	28.7	30.2	30.6	30.2	31	31.2	31.4	31.4	31.11	32.2			4	11.7
	5	20.8	24.5	27.6	30.9	33.4	36.5	39.3	41.6	44.9	45.9	46.6	48.4	49.4	50.7	52.2	52.69	52.2			5	31.4
	6	20.1	23.2	26.5	28.1	29	29.3	30.3	30.5	31.9	32.2	32.1	33.1	33.9	35.8	36.8	36.84	36.6			6	16.5
	7	21.8	24.8	26.7	28.3	29	30	31.4	31.7	33.6	33.5	32.9	34.4	34.5	35.9	37	36.88	36.4			7	14.6
	8	21.7	23.6	26.6	29.6	31.2	33.3	35.6	37	39	39.1	38.7	40	41.5	42.3	43.2	44.05	44			8	22.3
	9	21.8	25.1	27.4	29.6	30.5	31.3	33.7	34.5	36.5	37.6	36.8	37.9	39.1	41.2	42.9	44.3	44.1			9	22.3
	10	21.4	24.6	27.5	27.8	27.9	30.2	32.2	34.6	37	37.6	37.4	39.7	40.7	43	43.8	45.62	46.2			10	24.8
	11	22.2	23.9	26.4	28.1	30	32.7	35.1	35.9	37.7	38	38.2	39.2	40.6	42.1	43.5	44.52	44.6			11	22.4
	12	22	23.7	25.5	27.7	27.7	29.2	30.7	31.2	33.1	33.8	33.6	35	35.8	37	38.2	39.28	38.6			12	16.6
HFD5	1	18.5	21.3	23.1	24.7	25.2	25.7	25.8	26.6	35	28.3	27.8	28.7	29.6	29.3	30.2	31.09	30.1		HFD5	1	11.6
	2	19	25	28.9	30.9	32	34.4	36.6	38.2	39.2	41.2	41.6	42.7	44.8	46.7	48.4	50.04	48.9			2	29.9
	3	20	22.6	24.8	26.9	29.1	30.3	31.8	33.3	34.5	35	35	36.7	39.1	41.6	43.1	45.73	45.7			3	25.7
	4	20.7	24.6	28	28.6	30.6	32.9	35	36.8	35	39.2	38.9	40.9	42.4	45	46	47.43	43.4			4	22.7
	5	20.6	24.1	26.1	28.1	30.6	30.4	32.4	34.8	35	35.4	35.4	36.6	38	40	41.8	43.14	41.3			5	20.7
	6	20.9	23.7	25.4	28	30	31.6	33.3	35	36	37.1	37.3	38.1	39.3	42.4	44.4	45.17	44.6			6	23.7
	7	21.5	26.3	28.1	29.8	32.7	34.2	35.5	36.5	37.7	39	40.3	43	44.9	48.1	49	50.8	47.1			7	25.6
	8	21.1	23.6	24.7	26.6	27.7	29	28.4	29.1	30.1	30.4	30.3	30.5	31.1	32.3	33.8	33.72	32.6			8	11.5
	9	21.1	24.3	26.6	28.4	32	32.4	34	36.2	34	37.9	36.7	38.3	40.1	43.2	45.2	47.06	46.1			9	25
	10	22.8	26.1	27.8	29.6	32.4	33.7	33.1	36	36.3	38.3	38.7	40.7	41.4	43.1	44.5	45.95	44.2			10	21.4
	11	22.2	25	26.8	28.3	30.8	32.6	34	35.6	36.6	38.2	39.6	41.3	42.9	45	42.2	42.37	40.4			11	18.2
	12	23.2	26.4	28.4	31	31	35.3	36.5	39.4	40.7	42.2	42.5	44.6	46.9	49.8	50.2	51.49	49.7			12	26.5
HFD6	1	19.8	21.5	22.7	23.3	24.2	24.9	27	26.3	26.9	27.1	27.2	27.5	26.4	26.7	27.1	27.9	28.9		HFD6	1	9.1
	2	19.8	22.4	23.9	24.5	23.7	26	26.9	27.3	28.4	28	27.4	28.4	27.8	28.4	29	29.53	30.5			2	10.7
	3	20.8	23.9	26.6	27	29.3	30.2	31.3	32.4	34.9	35.7	34.8	36.4	36.2	38.4	40	38.25	40			3	19.2
	4	20.1	23.5	24.6	26.4	27.4	28.7	30.8	30.8	32.5	33.3	32.1	33	33.3	34.9	35.7	34.55	36.3			4	16.2
	5	20.4	23.6	26.3	27.6	30	31	32.8	34.1	35.9	36.4	35.7	37.4	38.5	40	42.4	39.55	41.2			5	20.8
	6	20.8	23.9	25.8	27.2	28.9	29.9	31.7	33.1	35.6	36.7	36.8	38.2	38.2	40.6	41.9	40.13	41.4			6	20.6
	7	21.4	24.8	27.3	28.4	30.1	31.1	32	33.3	34.7	34.7	33.7	34.6	35.2	35.8	37.6	36.24	37.4			7	16
	8	21.2	23.4	25.1	24.8	27.1	28.1	29	29.1	30.1	30.8	31	31.2	30.5	31.2	32.6	31.85	33.3			8	12.1
	9	21.5	23.7	26.4	28.2	29.6	30.8	32.3	33.3	36.2	36	35.4	36.9	37	38	40	38.8	40			9	18.5
	10	21.1	24.1	26.4	27.6	28.7	29.3	31.4	32.2	33.9	34.2	33.5	35.8	35.4	36.2	37.6	37.44	39			10	17.9
	11	22.6	25.7	28.4	29.3	31.1	32	32.8	32.8	34.3	35.5	34.8	36.2	36.4	37.6	39	38.39	38.6			11	16
	12	22.3	25.5	27.2	29.6	30.9	32.1	33.1	35.2	37.7	39.7	39.4	40.6	41.2	43.3	44.7	42.51	44			12	21.7
	1	23	26.6	30	31.5	34.2	36	37.3	37.7	40	41.3	41.5	44.8	45.3	47	48.5	46.14	48.4			1	25.4
HFD7	2	20.6	23.3	25.9	27	26.7	28.8	30	31.1	31.5	31.6	31.7	32.7	33.1	35	36.4	37.25	37.3			2	16.7
	3	20.2	23.8	25.3	26.6	28.5	29.9	32	33.2	34.2	33.8	33.3	35.5	34.9	36.5	36.6	38.93	36.4			3	16.2
	4	20	23.4	24.3	25.8	26	26.4	29	29.7	30	30.9	31.31	31.5	31.3	32.8	33.2	32.4	32.1			4	12.1
	5	20.1	23.4	24.2	26	28	30.2	31.4	33	33.2	33.6	30.1	31	32.5	34.3	34.8	36.25	35.5			5	15.4
	6	20.7	23.5	24.6	27	28.6	29.5	30.6	31.3	32.2	33.3	33.6	34.3	34.5	34.5	35	33.86	33.5			6	12.8
	7	21.2	23.6	25.5	27	27.2	29.7	31.2	30.5	32.2	32.7	33	34.1	33.8	35.1	36.1	36.78	36.6			7	15.4
	8	21.3	25.2	28.2	30.8	32.6	33.9	36.3	38.4	39.7	40.4	39.8	41.4	41.9	43	43.3	44.76	43.9			8	22.6
	9	21	23	25.4	27.9	30.7	31.6	33.8	35.9	37	33.5	31.9	35.1	36.4	37.8	39	41.36	41.7			9	20.7
	10	22.1	25.6	27.9	28.3	28.3	30.5	32.3	33.6	32.7	34.2	34.4	34.7	34.1	34.5	34.5	35.2	35.2			10	13.1
	11	22.2	25.4	28	29.9	31.8	32	33.8	35.5	35.5	35.9	36.5	37	35.7	36	36.9	37.17	35.5			11	13.3
	12	23	25.5	28.7	29.9	31.2	32.1	33.7	34.9	35.5	36.3	37.5	38.4	39	39.7	40.5	42.15	41.3			12	18.3
	mean	21.0107	24.1619	26.4286	28.0345	29.4614	30.856	32.5131	33.7905	35.2024	35.8048	35.6858	37.0143	37.756	39.2095	40.369	40.9765	40.3774			mean	19.3667
	sd	1.15571	1.16339	1.46292	1.70799	2.14668	2.27989	2.47502	2.95344	3.07026	3.39858	3.59282	3.87445	4.32767	4.76462	4.94943	5.2946	4.91703			sd	4.65859

## Sheet: Fig1(F-G)
		Fig1 (F) Adipose tissue indexes and Fig1(G) total visceral white adipose tissues index [(vWAT mass(g)/body weight(g)]in mice.
Group	ID	Body weight（g） of week 16	eWAT（g）	pWAT（g）	mWAT（g）	vWAT weight（g）	eWAT index	pWATindex	mWATindex	vWAT Index
CON	1	28.3	0.4024	0.1125	0.2624	0.4024	0.0142191	0.00397527	0.00927208	0.0142191
CON	2	28.6	0.3729	0.061	0.32	0.3729	0.0130385	0.00213287	0.0111888	0.0130385
CON	3	26.5	0.4685	0.1094	0.1022	0.4685	0.0176792	0.0041283	0.0038566	0.0176792
CON	4	29.8	0.3045	0.0659	0.155	0.3045	0.0102181	0.00221141	0.00520134	0.0102181
CON	5	34.9	0.5277	0.1452	0.3308	0.5277	0.0151203	0.00416046	0.00947851	0.0151203
CON	6	33.8	0.5122	0.1527	0.284	0.5122	0.0151538	0.00451775	0.00840237	0.0151538
CON	7	25	0.1783	0.0453	0.1517	0.1783	0.007132	0.001812	0.006068	0.007132
CON	8	32.9	0.6881	0.2273	0.3428	0.6881	0.0209149	0.00690881	0.0104195	0.0209149
CON	9	31.3	0.3867	0.0321	0.2176	0.3867	0.0123546	0.00102556	0.00695208	0.0123546
CON	10	30.3	0.4558	0.1115	0.2591	0.4558	0.0150429	0.00367987	0.00855116	0.0150429
	mean	30.14	0.42971	0.10629	0.24256	0.42971	0.0140874	0.00345523	0.00793904	0.0140874
	sd	3.00972	0.130409	0.0559403	0.0790329	0.130409	0.00360697	0.00161947	0.00223799	0.00360697
HFD	1	38.5	1.448	0.5282	0.5278	1.448	0.0376104	0.0137195	0.0137091	0.0376104
HFD	2	38.9	1.6915	0.7459	0.4761	1.6915	0.0434833	0.0191748	0.0122391	0.0434833
HFD	3	39.4	1.7265	0.4862	0.533	1.7265	0.0438198	0.0123401	0.0135279	0.0438198
HFD	4	38.8	2.322	0.9406	0.4805	2.322	0.0598454	0.0242423	0.012384	0.0598454
HFD	5	40.1	2.322	0.6295	0.4743	2.322	0.0579052	0.0156983	0.0118279	0.0579052
HFD	6	40.6	2.6021	0.8048	0.7208	2.6021	0.0640911	0.0198227	0.0177537	0.0640911
HFD	7	36.9	1.6353	0.5235	0.3913	1.6353	0.0443171	0.014187	0.0106043	0.0443171
HFD	8	36.8	1.3736	0.4041	0.5179	1.3736	0.0373261	0.010981	0.0140734	0.0373261
HFD	9	40.2	1.8251	0.7002	0.9051	1.8251	0.0454005	0.0174179	0.0225149	0.0454005
HFD	10	38.4	1.8927	0.6663	0.523	1.8927	0.0492891	0.0173516	0.0136198	0.0492891
	mean	38.86	1.88388	0.64293	0.55498	1.88388	0.0483088	0.0164935	0.0142254	0.0483088
	sd	1.22817	0.384346	0.154418	0.140986	0.384346	0.00882118	0.00375757	0.003294	0.00882118

## Sheet: Fig2(A)
Fig2 (A)The change of fasting blood glucose in mice during the 16- week IR model period
		FBG(mmol/l）
Group	number	week 4	week 8	week 12	week 16
CON	1	4.5	6.3	5.2	8.2
CON	2	5.5	7.7	6.2	7.7
CON	3	4.8	6.7	4.1	9.7
CON	4	5.7	6.7	7.3	8.4
CON	5	4.4	5.4	7.1	7.7
CON	6	5.2	7.1	5.9	7.4
CON	7	5.9	9.4	7.4	8.5
CON	8	4.1	7.5	6.4	7.7
CON	9	5.3	7.8
CON	10	5.8	8.7
	mean	5.12	7.33	6.2	8.1625
	sd	0.63561	1.16338	1.13389	0.732778
HFD	1	5.3	7.5	7.2	7.9
HFD	2	4.3	6	6.1	10.2
HFD	3	4.7	8.2	6.7	8.9
HFD	4	4.9	6.3	6.6	10.4
HFD	5	4.4	6.9	6.6	7.9
HFD	6	3.9	7.5	8.4	11.2
HFD	7	4.9	8.8	6.2	9
HFD	8	4.3	7.3	6.3	9.4
HFD	9	4.2	11.4
HFD	10	5.4	9.7
	mean	4.63	7.96	6.7625	9.3625
	sd	0.492274	1.63992	0.7463	1.18193

## Sheet: Fig2B-E
Fig2(B) Fasting blood glucose at 16th week (FBG)						Fig2 (C) Fasting serum insulin (FINS)					Fig2(D)Homeostatic model assessment of insulin resistance							Fig2(E) Insulin sensitivity index (ISI)
		FBG(mmol/L）						FINS(μU/ml)					HOMA-IR=（FBG×FINS）/22.5					ISI =1/（FBG×FINS)
Group	number					Group	number				Group	number				Group	number
CON	1	8.2				CON	1	2.85645			CON	1	1.04102			CON	1	0.0426932
CON	2	7.3				CON	2	2.85645			CON	2	0.926761			CON	2	0.0479568
CON	3	8.5				CON	3	2.9029			CON	3	1.09665			CON	3	0.0405274
CON	4	8.4				CON	4	3.27146			CON	4	1.22134			CON	4	0.0363898
CON	5	7.4				CON	5	4.34274			CON	5	1.42828			CON	5	0.0311175
CON	6	7.7				CON	6	3.13513			CON	6	1.07291			CON	6	0.0414241
CON	7	7.7				CON	7	2.53133			CON	7	0.866277			CON	7	0.0513051
CON	8	9.7				CON	8	2.06687			CON	8	0.891049			CON	8	0.0498788
	mean	8.1125					mean	2.99542				mean	1.06804				mean	0.0426616
	sd	0.780911					sd	0.658544				sd	0.187784				sd	0.00690266
HFD	1	9.4				HFD	1	6.47927			HFD	1	2.7069			HFD	1	0.016419
HFD	2	11.2				HFD	2	7.31531			HFD	2	3.6414			HFD	2	0.0122053
HFD	3	10.2				HFD	3	4.31952			HFD	3	1.95818			HFD	3	0.0226968
HFD	4	9				HFD	4	7.87267			HFD	4	3.14907			HFD	4	0.0141135
HFD	5	7.9				HFD	5	4.76076			HFD	5	1.67155			HFD	5	0.0265887
HFD	6	7.9				HFD	6	4.57497			HFD	6	1.60632			HFD	6	0.0276684
HFD	7	8.9				HFD	7	7.17597			HFD	7	2.8385			HFD	7	0.0156577
HFD	8	11.2				HFD	8	3.73881			HFD	8	1.8611			HFD	8	0.0238808
	mean	9.4625					mean	5.77966				mean	2.42913				mean	0.0199038
	sd	1.30924					sd	1.60199				sd	0.758572				sd	0.00599477

## Sheet: Fig2F
Fig2(F)the oral glucose tolerance (OGTT) experiment.										Fig2 (H)Area under the curve (AUC) of OGTT
		FBG(mmol/L）
										AUC value（mmol/L.min）
Group	number	0min	15min	30min	60min	120min		Group	number
CON	1	8.8	17.4	11.8	10.9	8.7		CON	1	1344			8.8	17.4	11.8	10.9	8.7	1344
CON	2	6	17.3	10.9	8.3	5.9		CON	2	1100.25			6	17.3	10.9	8.3	5.9	1100.25
CON	3	11	16.1	13.9	12.9	11		CON	3	1547.25			11	16.1	13.9	12.9	11	1547.25
CON	4	8.8	15.8	11	8.9	7		CON	4	1161			8.8	15.8	11	8.9	7	1161
CON	5	10.4	16.9	16	11.7	9.9		CON	5	1515			10.4	16.9	16	11.7	9.9	1515
CON	6	10.5	14.9	12.5	8.5	8		CON	6	1206			10.5	14.9	12.5	8.5	8	1206
CON	7	9.2	23.1	14.1	10.9	9.9		CON	7	1520.25			9.2	23.1	14.1	10.9	9.9	1520.25
CON	8	9.4	21.1	9.5	6.6	7.3		CON	8	1116.75			9.4	21.1	9.5	6.6	7.3	1116.75
CON	9	10.7	22.4	16.3	10.4	7		CON	9	1461			10.7	22.4	16.3	10.4	7	1461
CON	10	8.2	19.2	14.5	11.3	8.4		CON	10	1436.25			8.2	19.2	14.5	11.3	8.4	1436.25
CON	11	8.2	23.9	16.4	10.4	8.8		CON	11	1521			8.2	23.9	16.4	10.4	8.8	1521
CON	12	11.4	19.4	17.3	13.7	10.4		CON	12	1694.25			11.4	19.4	17.3	13.7	10.4	1694.25
	mean	9.38333	18.9583	13.6833	10.375	8.525			mean	1385.25			12.5	20.7	27.6	22	17.6	2543.25
	sd	1.52723	3.04943	2.5398	2.01906	1.5627			sd	195.632			9.3	17.2	18	11.8	11.8	1617.75
HFD	1	12.5	20.7	27.6	22	17.6		HFD	1	2543.25			10.1	23.8	18.5	16.3	10.5	1897.5
HFD	2	9.3	17.2	18	11.8	11.8		HFD	2	1617.75			10.4	24.1	23.7	21.4	13.8	2349.75
HFD	3	10.1	23.8	18.5	16.3	10.5		HFD	3	1897.5			10.4	22.6	19.2	16.3	10.9	1909.5
HFD	4	10.4	24.1	23.7	21.4	13.8		HFD	4	2349.75			11.3	25	17.2	15.8	10.8	1881.75
HFD	5	10.4	22.6	19.2	16.3	10.9		HFD	5	1909.5			10.4	23.1	17.9	14.9	12.9	1884.75
HFD	6	11.3	25	17.2	15.8	10.8		HFD	6	1881.75			10	25.6	19.4	13.9	12.2	1887
HFD	7	10.4	23.1	17.9	14.9	12.9		HFD	7	1884.75			12.9	26.5	18.1	16.3	13.3	2034
HFD	8	10	25.6	19.4	13.9	12.2		HFD	8	1887			12.8	28.2	26.9	24.3	18.8	2781.75
HFD	9	12.9	26.5	18.1	16.3	13.3		HFD	9	2034			11.2	24.9	22.1	21.1	14.5	2339.25
HFD	10	12.8	28.2	26.9	24.3	18.8		HFD	10	2781.75			12.5	26.5	20.4	15.9	12.8	2049.75
HFD	11	11.2	24.9	22.1	21.1	14.5		HFD	11	2339.25			11.1	30.8	25.8	24.1	10.3	2519.25
HFD	12	12.5	26.5	20.4	15.9	12.8		HFD	12	2049.75			8	21.9	19.1	14.3	10.8	1785.75
HFD	13	11.1	30.8	25.8	24.1	10.3		HFD	13	2519.25			8.7	23.7	17.2	14.9	11.7	1829.25
HFD	14	8	21.9	19.1	14.3	10.8		HFD	14	1785.75			9.5	28.9	25.8	12.8	11.7	2012.25
HFD	15	8.7	23.7	17.2	14.9	11.7		HFD	15	1829.25			6.8	21.6	19.1	12.5	7.8	1601.25
HFD	16	9.5	28.9	25.8	12.8	11.7		HFD	16	2012.25			8.3	22.3	18.6	16.9	11.2	1911.75
HFD	17	6.8	21.6	19.1	12.5	7.8		HFD	17	1601.25			11.5	17.6	13.3	14	12.9	1666.5
HFD	18	8.3	22.3	18.6	16.9	11.2		HFD	18	1911.75			10.3	21	13.2	15.5	13.4	1788.75
HFD	19	11.5	17.6	13.3	14	12.9		HFD	19	1666.5			13.3	22.8	17.9	16.4	15.9	2059.5
HFD	20	10.3	21	13.2	15.5	13.4		HFD	20	1788.75			11.5	22	16.9	14.5	8.4	1701
HFD	21	13.3	22.8	17.9	16.4	15.9		HFD	21	2059.5			9.1	19.3	13.2	12.9	11	1565.25
HFD	22	11.5	22	16.9	14.5	8.4		HFD	22	1701			13.3	27.4	22.3	19.1	15.8	2346
HFD	23	9.1	19.3	13.2	12.9	11		HFD	23	1565.25			9.2	27.7	25.2	16.5	15.4	2256
HFD	24	13.3	27.4	22.3	19.1	15.8		HFD	24	2346			11.1	28.1	27.5	23.3	18.1	2715
HFD	25	9.2	27.7	25.2	16.5	15.4		HFD	25	2256			10.2	25.2	25.6	18.5	12.9	2250
HFD	26	11.1	28.1	27.5	23.3	18.1		HFD	26	2715			7.1	23.6	14.1	11.5	6.8	1446
HFD	27	10.2	25.2	25.6	18.5	12.9		HFD	27	2250			9.8	23.5	18	14	16.7	1962
HFD	28	7.1	23.6	14.1	11.5	6.8		HFD	28	1446			9.7	21.6	16.9	13.7	11.1	1726.5
HFD	29	9.8	23.5	18	14	16.7		HFD	29	1962			9.5	27.5	21.5	18.9	12.4	2190
HFD	30	9.7	21.6	16.9	13.7	11.1		HFD	30	1726.5			11.2	28.2	20	17.4	13.9	2157
HFD	31	9.5	27.5	21.5	18.9	12.4		HFD	31	2190			12.9	27	16.1	15.5	12.9	1948.5
HFD	32	11.2	28.2	20	17.4	13.9		HFD	32	2157			11.9	20.1	22.8	16.4	11.4	1983.75
HFD	33	12.9	27	16.1	15.5	12.9		HFD	33	1948.5			12.5	23.3	22.4	15.8	11.3	1997.25
HFD	34	11.9	20.1	22.8	16.4	11.4		HFD	34	1983.75			10.1	21.8	19.4	13	8.9	1691.25
HFD	35	12.5	23.3	22.4	15.8	11.3		HFD	35	1997.25			6.5	20.6	19.7	16.5	11	1873.5
HFD	36	10.1	21.8	19.4	13	8.9		HFD	36	1691.25			6.1	17.9	19.4	15.175	9.975	1732.88
HFD	37	6.5	20.6	19.7	16.5	11		HFD	37	1873.5			8.4	24.7	25.5	20.1	10.3	2220.75
HFD	38	6.1	17.9	19.4	15.175	9.975		HFD	38	1732.88			7.9	18.9	20.3	13.3	10	1698
HFD	39	8.4	24.7	25.5	20.1	10.3		HFD	39	2220.75			7.6	18.6	12.1	10.8	8.6	1352.25
HFD	40	7.9	18.9	20.3	13.3	10		HFD	40	1698
HFD	41	7.6	18.6	12.1	10.8	8.6		HFD	41	1352.25
	mean	10.1683	23.5561	19.9488	16.2994	12.2555			mean	1979.59
	sd	1.93487	3.39412	4.09177	3.39144	2.73777			sd	325.288

## Sheet: Fig2G
Fig2(G)intraperitoneal insulin tolerance test (IPITT) experiment.										Fig2 (I)Area under the curve (AUC) of iPITT
		FBG(mmol/L）
										AUC value（mmol/L.min）
Group	number	0min	15min	30min	60min	120min		Group	number
CON	1	9	4.1	3.8	2.3	4.2		CON	1	444
CON	2	11.5	4.1	3.3	4.2	6.6		CON	2	609
CON	3	9.7	4.5	3.9	4.2	5.8		CON	3	591
CON	4	11.5	4.4	3.8	4.1	6.7		CON	4	623.25
CON	5	8.9	7.5	5.2	3.9	4.2		CON	5	597.75
CON	6	11.1	4.1	4.1	3.3	4.3		CON	6	514.5
CON	7	10.5	4.2	4.4	3.3	4.6		CON	7	527.25
CON	8	13.3	7.3	5.3	3.8	4.3		CON	8	628.5
CON	9	8.9	4.7	3.6	2.1	3		CON	9	402.75
CON	10	9.3	5.5	3.8	3.7	3		CON	10	494.25
CON	11	10.7	4.1	3.9	4.3	4.8		CON	11	567
CON	12	12	4.4	5	4.7	6.1		CON	12	663
	mean	10.5333	4.90833	4.175	3.65833	4.8			mean	555.188
	sd	1.41185	1.22953	0.655224	0.791384	1.25336			sd	79.4924
HFD	1	15.6	16.4	9.4	10.8	14.8		HFD	1	1504.5	2
HFD	2	14.4	9.7	6.4	6.8	10.5		HFD	2	1018.5	3
HFD	3	13.6	6.2	5.6	6	9.6		HFD	3	879
HFD	4	14.3	7.5	5.8	5.9	9.5		HFD	4	900.75
HFD	5	13.5	10.3	5.3	5.3	9.3		HFD	5	892.5
HFD	6	12.4	6	5.4	5.5	8.2		HFD	6	798
HFD	7	11.5	7.5	5.9	7.1	8.5		HFD	7	906
HFD	8	13.2	7.4	5.9	6.8	9.4		HFD	8	930.75
HFD	9	13.8	8.5	6.9	9.7	10.7		HFD	9	1143.75
HFD	10	13.8	6.7	5.5	5.7	5.8		HFD	10	758.25
HFD	11	12	8.5	6.9	8.5	10.3		HFD	11	1064.25
HFD	12	16.1	9.8	7.2	8.7	10.6		HFD	12	1139.25
HFD	13	15	7.9	5.6	4.8	8.5		HFD	13	828
HFD	14	12.5	7.6	5.7	6.4	9.3		HFD	14	903
HFD	15	16.9	10.8	7.4	7.9	14.9		HFD	15	1257.75
HFD	16	16.8	11.9	5.8	7.2	10.5		HFD	16	1074
HFD	17	13.7	7.3	6	4.5	8.1		HFD	17	792.75
HFD	18	9.2	8.8	4.9	4.6	6.9		HFD	18	725.25
HFD	19	12.5	8.1	5.8	6.6	8.6		HFD	19	900.75
HFD	20	13.8	8	6.9	9.7	11.2		HFD	20	1151.25
HFD	21	15.4	7.9	6.1	6.8	10		HFD	21	977.25
HFD	22	14.5	11.6	9.7	11.4	11.9		HFD	22	1371
HFD	23	14.4	6.7	6.3	5.1	6.2		HFD	23	765.75
HFD	24	14.3	5.9	5.6	4.6	4.9		HFD	24	675.75
HFD	25	14	12.3	6.9	8	10.1		HFD	25	1107.75
HFD	26	20	19.7	8.4	9.9	9		HFD	26	1350
HFD	27	14.9	10.8	7.4	7.7	11.4		HFD	27	1128.75
HFD	28	15.5	10.7	7.4	6.3	7.5		HFD	28	951.75
HFD	29	14.9	10.1	6.5	4.7	6.8		HFD	29	825
HFD	30	15.7	9.4	5.2	5.6	9.5		HFD	30	912.75
HFD	31	15.3	11.1	7.4	6.3	9.3		HFD	31	1010.25
HFD	32	13.3	15.1	11	10.9	12.4		HFD	32	1436.25
HFD	33	13.4	4.8	3.4	4.5	8.7		HFD	33	712.5
HFD	34	14.4	7.8	5.6	6.4	9.4		HFD	34	921
HFD	35	13.9	7.9	6.2	5.2	9.9		HFD	35	893.25
HFD	36	13.2	5.4	5.2	7	9		HFD	36	882
HFD	37	13.4	5.8	4.7	5.5	8.5		HFD	37	795.75
HFD	38	9.8	6.9	5.1	4.3	3.3		HFD	38	584.25
HFD	39	7.6	5.2	4.4	2.6	4.6		HFD	39	489
HFD	40	13.8	7.3	5.7	5.4	9.1		HFD	40	857.25
HFD	41	15.1	5.4	4.7	5.3	9.6		HFD	41	826.5
	mean	13.9366	8.84634	6.27317	6.63415	9.17805			mean	952.244
	sd	2.08983	3.08797	1.44983	2.01452	2.31781			sd	220.043

## Sheet: Fig3A
Fig3 (A)Effects of different ratios of DHA/EPA supplement afer 12 week on Body weight（BW) gain of IR mice
Group	number	Initial BW(g)	Final BW(g)	Bwgain(g)		number	Bwgain(g)（n=10)
1（CON)-	1	33.8	35.3	1.5		1	1.5
	2	27.3	29.5	2.2		2	2.2
	3	31.3	32.64	1.34		3	1.344
	4	28.6	30.3	1.7	Paper data:Remove the maximum and minimum value	4	1.7
	5	32.6	34.1	1.5		5	1.5
	6	29.2	31.6	2.4		6	2.4
	7	30.6	32.2	1.6		7	1.6
	8	33.9	38.1	4.2		8
	9	27.4	28.9	1.5		9	1.5
	10	25.8	26.3	0.5		10	0.5
	11	33.2	32.4	-0.8		11
	12	30.2	29.7	-0.5		12	-0.5
	Mean	30.325	31.7533	1.42833		Mean	1.3744
	sd	2.72634	3.14902	1.31059		sd	0.831103
2（HFD)	1	45.2	48.4	3.2		1	3.2
	2	35.2	37.2	2		2	2
	3	49.7	54.4	4.7		3	4.7
	4	35.5	43.2	7.7		4	7.7
	5	38.1	36.2	-1.9		5
	6	45.7	49.4	3.7		6	3.7
	7	40.7	47.6	6.9		7	6.9
	8	49.7	54.7	5		8	5
	9	39	42.5	3.5		9	3.5
	10	45.2	50	4.8		10	4.8
	11	30.5	32	1.5		11
	12	41.8	47.5	5.7		12	5.7
	Mean	41.3583	45.2583	3.9		Mean	4.72
	sd	5.98854	7.18173	2.57682		sd	1.72935
3(DHA/EPA=3:1)	1	48.4	54.7	6.3		1	6.3
	2	43.9	49.3	5.4		2	5.4
	3	33.5	37	3.5		3	3.5
	4	40	40.2	0.2		4	0.2
	5	30.5	32.2	1.7		5	1.7
	6	43.6	48.3	4.7		6	4.7
	7	36.6	42	5.4		7	5.4
	8	41.2	51	9.8		8
	9	36.3	45.4	9.1		9	9.1
	10	48.3	52.2	3.9		10	3.9
	11	38.2	32.4	-5.8		11
	12	36.6	39.8	3.2		12	3.2
	Mean	39.7583	43.7083	3.95		Mean	4.34
	sd	5.56702	7.61057	4.11196		sd	2.4762
4(DHA/EPA=1.5:1)	1	41.3	48.3	7		1	7
	2	38.6	48.3	9.7		2	9.7
	3	32.2	30.3	-1.9		3	-1.9
	4	44	40.2	-3.8		4
	5	41.3	38.8	-2.5		5	-2.5
	6	38.1	43	4.9		6	4.9
	7	46.6	49.8	3.2		7	3.2
	8	45.6	49.3	3.7		8	3.7
	9	45.7	46.7	1		9	1
	10	36.6	36.2	-0.4		10	-0.4
	11	36.4	37.6	1.2		11	1.2
	Mean	37.6639	39.6759	2.18433		Mean	2.57965
	sd	11.0283	11.8236	4.01794		sd	3.69352
5(DHA/EPA=1:1)	1	44	48	4		1	4
	2	40.8	35.4	-5.4		2
	3	35.5	41.8	6.3		3	6.3
	4	40.7	48.9	8.2		4	8.2
	5	47.1	53.3	6.2		5	6.2
	6	39	47.4	8.4		6	8.4
	7	44.2	51.1	6.9		7	6.9
	8	40.4	49.8	9.4		8
	9	46.7	51.1	4.4		9	4.4
	10	36.3	42.8	6.5		10	6.5
	11	38.6	44.78	6.18		11	6.18
	12	33.3	38	4.7		12	4.7
	Mean	40.55	46.0317	5.48167		Mean	6.178
	sd	4.35253	5.55826	3.79435		sd	1.48157
6(DHA/EPA=1:1.5)	1	32.6	39	6.4		1	6.4
	2	37.4	48.4	11		2
	3	32.1	41.1	9		3	9
	4	44.6	49.9	5.3		4	5.3
	5	45.7	51.2	5.5		5	5.5
	6	37.3	48.2	10.9		6	10.9
	7	43	46.7	3.7		7
	8	52.2	57.8	5.6		8	5.6
	9	41.3	48.3	7		9	7
	10	46.1	53.41	7.31		10	7.31
	11	41.7	49.9	8.2		11	8.2
	12	35.9	43.8	7.9		12	7.9
	Mean	40.825	48.1425	7.3175		Mean	7.311
	sd	5.97831	5.14123	2.22989		sd	1.76537
7(DHA/EPA=1:3)	1	43.1	48.8	5.7		1	5.7
	2	44.6	49.6	5		2	5
	3	46.4	49.7	3.3		3	3.3
	4	43.5	41	-2.5		4	-2.5
	5	41.1	36.1	-5		5	-5
	6	33.7	34.7	1		6	2.94
	7	42.6	37.2	-5.4		7
	8	48.9	54.4	5.5		8	5.5
	9	36.6	46.9	10.3		9	10.3
	10	35.7	36.3	0.6		10	0.6
	11	36.4	47.9	11.5		11
	12	28.9	32.5	3.6		12	3.6
	Mean	40.125	42.925	2.8		Mean	2.944
	sd	5.85338	7.38846	5.3735		sd	4.36224

## Sheet: Fig3B-C
Fig3(C) Food intake
	Food intake（g/day/mouse）
	week1	week2	week3	week4	week5	week6	week7	week8	week9	week10	week11	week12	mean	sd
1-CON	2.59609	2.64583	2.84479	2.89375	2.77188	2.76667	2.86875	2.89167	2.89167	2.91875	2.93359	2.95938	2.8319	0.114698
2-HFD	2.2275	2.87778	3.60278	3.21667	3.04028	2.93472	3.2	3.28056	3.21389	3.05556	3.14062	2.79583	3.04885	0.334152
3(DHA/EPA=3:1)	2.32212	3.04103	3.29231	3.31827	3.25513	3.36458	3.22179	3.17308	3.25641	3.13462	2.8875	2.9	3.09724	0.288913
4(DHA/EPA=1.5:1)	2.20962	2.94103	3.32639	3.31667	3.10556	3.10417	3.07361	3.21944	3.37576	3.16061	3.12841	3.09091	3.08768	0.303023
5(DHA/EPA=1:1)	2.34808	2.6641	3.01	2.95625	3.0125	2.92639	3.22639	3.1625	3.28333	3.15694	3.10417	3.35417	3.01707	0.279736
6(DHA/EPA=1:1.5)	2.3125	2.61667	2.97222	2.99271	3.01389	2.9875	2.9	2.79167	2.92222	2.86389	2.825	2.75	2.82902	0.200244
7(DHA/EPA=1:3)	2.16346	3.08974	3.23846	3.12212	3.01667	3.10641	3.18846	3.08269	3.39744	3.49744	3.35192	3.65385	3.15905	0.367642
Fig3(B) Energy intake
	Energy intake（kcal/day/mouse）
	week1	week2	week3	week4	week5	week6	week7	week8	week9	week10	week11	week12	mean	sd
1-CON	9.99496	10.1865	10.9524	11.1409	10.6717	10.6517	11.0447	11.1329	11.1329	11.2372	11.2943	11.3936	10.9028	0.441587
2-HFD	10.5361	13.6119	17.0411	15.2148	14.3805	13.8812	15.136	15.517	15.2017	14.4528	14.8552	13.2243	14.4211	1.58054
3(DHA/EPA=3:1)	10.9836	14.3841	15.5726	15.6954	15.3968	15.9145	15.2391	15.0087	15.4028	14.8267	13.6579	13.717	14.6499	1.36656
4(DHA/EPA=1.5:1)	10.4515	13.9111	15.7338	15.6878	14.6893	14.6827	14.5382	15.228	15.9673	14.9497	14.7974	14.62	14.6047	1.4333
5(DHA/EPA=1:1)	11.1064	12.6012	14.2373	13.9831	14.2491	13.8418	15.2608	14.9586	15.5302	14.9323	14.6827	15.8652	14.2707	1.32315
6(DHA/EPA=1:1.5)	10.9381	12.3768	14.0586	14.1555	14.2557	14.1309	13.717	13.2046	13.8221	13.5462	13.3623	13.0075	13.3813	0.947156
7(DHA/EPA=1:3)	10.2332	14.6145	15.3179	14.7676	14.2688	14.6933	15.0814	14.5811	16.0699	16.5429	15.8546	17.2827	14.9423	1.73895
	the per feeding energy in control diet is 3.85kcal/g,while the per feeding energy in high fat diet is 4.73kcal/g
				2.59609	9.99496
				2.64583	10.1865
				2.84479	10.9524
				2.89375	11.1409
				2.77188	10.6717
				2.76667	10.6517
				2.86875	11.0447
				2.89167	11.1329
				2.89167	11.1329
				2.91875	11.2372
				2.93359	11.2943
				2.95938	11.3936
				2.2275	10.5361
				2.87778	13.6119
				3.60278	17.0411
				3.21667	15.2148
				3.04028	14.3805
				2.93472	13.8812
				3.2	15.136
				3.28056	15.517
				3.21389	15.2017
				3.05556	14.4528
				3.14062	14.8552
				2.79583	13.2243
				2.32212	10.9836
				3.04103	14.3841
				3.29231	15.5726
				3.31827	15.6954
				3.25513	15.3968
				3.36458	15.9145
				3.22179	15.2391
				3.17308	15.0087
				3.25641	15.4028
				3.13462	14.8267
				2.8875	13.6579
				2.9	13.717
				2.20962	10.4515
				2.94103	13.9111
				3.32639	15.7338
				3.31667	15.6878
				3.10556	14.6893
				3.10417	14.6827
				3.07361	14.5382
				3.21944	15.228
				3.37576	15.9673
				3.16061	14.9497
				3.12841	14.7974
				3.09091	14.62
				2.34808	11.1064
				2.6641	12.6012
				3.01	14.2373
				2.95625	13.9831
				3.0125	14.2491
				2.92639	13.8418
				3.22639	15.2608
				3.1625	14.9586
				3.28333	15.5302
				3.15694	14.9323
				3.10417	14.6827
				3.35417	15.8652
				2.3125	10.9381
				2.61667	12.3768
				2.97222	14.0586
				2.99271	14.1555
				3.01389	14.2557
				2.9875	14.1309
				2.9	13.717
				2.79167	13.2046
				2.92222	13.8221
				2.86389	13.5462
				2.825	13.3623
				2.75	13.0075
				2.16346	10.2332
				3.08974	14.6145
				3.23846	15.3179
				3.12212	14.7676
				3.01667	14.2688
				3.10641	14.6933
				3.18846	15.0814
				3.08269	14.5811
				3.39744	16.0699
				3.49744	16.5429
				3.35192	15.8546
				3.65385	17.2827

## Sheet: Fig3D-E
	Fig3(D) Food efficiency ratio(FER) and (E) Energy efficiency rati(EER).								Fig3(D) Food efficiency ratio(FER) and (E) Energy efficiency rati(EER).
				Cumulative food intake(g) after DHA/EPA supplemet (g/per mouse)	Cumulative enery intake(kcal) after DHA/EPA supplemet (kcal/per mouse)	Food efficiency ratio(FER)	Energy efficiency ratio(EER)				BW gain(g)	Cumulative food intake(g) after DHA/EPA supplemet (g/per mouse)	Cumulative enery intake(kcal) after DHA/EPA supplemet (kcal/per mouse)	Food efficiency ratio(FER)	Energy efficiency ratio(EER)
	Group	number	BW gain(g)			FER was defined as cumulative weight gain of mice (g)/cumulative food intake of mice (g)	(EER) was cumulatived by weight gain of mice (g)/Cumulative energy intake of mice (kcal)）		Group	number				FER was defined as cumulative weight gain of mice (g)/cumulative food intake of mice (g)	(EER) was cumulatived by weight gain of mice (g)/Cumulative energy intake of mice (kcal)）
	1（CON)-	1	1.5	217.164	836.082	0.00690722	0.00179408		1（CON)-	1	1.5	217.164	836.082	0.007	0.002
		2	2.2			0.0101306	0.00263132			2	2.2			0.01	0.003
		3	1.34			0.00617045	0.00160271			3	1.344
		4	1.7			0.00782818	0.00203329	Paper data:Remove the maximum,minimum and outliers value		4	1.7			0.008	0.002
		5	1.5			0.00690722	0.00179408			5	1.5			0.007	0.002
		6	2.4			0.0110516	0.00287053			6	2.4			0.011	0.003
		7	1.6			0.0073677	0.00191369			7	1.6			0.007	0.002
		8	4.2			0.0193402	0.00502343			8	4.2
		9	1.5			0.00690722	0.00179408			9	1.5			0.007	0.002
		10	0.5			0.00230241	0.000598028			10	0.5			0.002	0.001
		11	-0.8			-0.00368385	-0.000956844			11	-0.8
		12	-0.5			-0.00230241	-0.000598028			12	-0.5
		mean				0.00657721	0.00170837			mean				0.007375	0.002125
		sd				0.00577807	0.0015008			sd				0.00249687	0.000599479
	2（HFD)	1	3.2	236.532	1118.8	0.0135288	0.00286021		2（HFD)	1	3.2	236.532	1118.8	0.014	0.003
		2	2			0.0084555	0.00178763			2	2			0.008	0.002
		3	4.7			0.0198704	0.00420094			3	4.7			0.02	0.004
		4	7.7			0.0325537	0.00688238			4	7.7
		5	-1.9			-0.00803273	-0.00169825			5	-1.9
		6	3.7			0.0156427	0.00330712			6	3.7			0.016	0.003
		7	6.9			0.0291715	0.00616733			7	6.9			0.029	0.006
		8	5			0.0211388	0.00446908			8	5			0.021	0.004
		9	3.5			0.0147971	0.00312836			9	3.5			0.015	0.003
		10	4.8			0.0202932	0.00429032			10	4.8			0.02	0.004
		11	1.5			0.00634163	0.00134072			11	1.5
		12	5.7			0.0240982	0.00509475			12	5.7			0.0240982	0.00509475
		mean				0.0164882	0.00348588			mean				0.0185665	0.00378831
		sd				0.0104304	0.00220515			sd				0.005786	0.0011448
	3(DHA/EPA=3:1)	1	6.3	239.892	1134.69	0.0262618	0.00555218		3(DHA/EPA=3:1)	1	6.3	239.892	1134.69	0.023	0.005
		2	5.4			0.0225101	0.00475901			2	5.4			0.015	0.003
		3	3.5			0.0145899	0.00308454			3	3.5			0.001	0
		4	0.2			0.000833708	0.00017626			4	0.2			0.007	0.001
		5	1.7			0.00708652	0.00149821			5	1.7			0.02	0.004
		6	4.7			0.0195921	0.0041421			6	4.7
		7	5.4			0.0225101	0.00475901			7	5.4			0.023	0.005
		8	9.8			0.0408517	0.00863672			8	9.8
		9	9.1			0.0379337	0.00801981			9	9.1			0.038	0.008
		10	3.9			0.0162573	0.00343706			10	3.9			0.016	0.003
		11	-5.8			-0.0241775	-0.00511153			11	-5.8
		12	3.2			0.0133393	0.00282015			12	3.2			0.013	0.003
		mean				0.0164657	0.00348113			mean				0.0173333	0.00355556
		sd				0.0164111	0.00346958			sd				0.00998888	0.00221666
	4(DHA/EPA=1.5:1)	1	7	237.729	1124.46	0.0294453	0.00622523		4(DHA/EPA=1.5:1)	1	7	237.729	1124.46	0.029	0.006
		2	9.7			0.012	0.003			2	9.7			0.012	0.003
		3	-1.9			-0.0079923	-0.0016897			3	-1.9
		4	-3.8			-0.0159846	-0.00337941			4	-3.8
		5	-2.5			-0.0105162	-0.0022233			5	-2.5
		6	4.9			0.0206117	0.00435766			6	4.9			0.021	0.004
		7	3.2			0.0134607	0.00284582			7	3.2			0.013	0.003
		8	3.7			0.015564	0.00329048			8	3.7			0.016	0.003
		9	1			0.00420648	0.000889318			9	1			0.004	0.001
		10	-0.4			-0.00168259	-0.000355727			10	-0.4			-0.002	0
		11	1.2			0.00504777	0.00106718			11	1.2			0.005	0.001
		mean				0.00583275	0.00127523			mean				0.0119988	0.00257963
		sd				0.013352	0.00284533			sd				0.00881945	0.00170043
	5(DHA/EPA=1:1)	1	4	229.955	1087.69	0.0173947	0.00367754		5(DHA/EPA=1:1)	1	4	229.955	1087.69	0.017	0.004
		2	-5.4			-0.0234829	-0.00496467			2	-5.4
		3	6.3			0.0273967	0.00579212			3	6.3			0.027	0.006
		4	8.2			0.0356592	0.00753895			4	8.2			0.036	0.008
		5	6.2			0.0269618	0.00570018			5	6.2			0.027	0.006
		6	8.4			0.036529	0.00772282			6	8.4			0.037	0.008
		7	6.9			0.0300059	0.00634375			7	6.9			0.03	0.006
		8	9.4			0.0408776	0.00864221			8	9.4
		9	4.4			0.0191342	0.00404529			9	4.4			0.019	0.004
		10	6.5			0.0282665	0.00597599			10	6.5			0.028	0.006
		11	-2.9			-0.0126112	-0.00266621			11	-2.9
		12	4.7			0.0204388	0.0043211			12	4.7			0.02	0.004
		mean				0.0205475	0.00434409			mean				0.0267778	0.00577778
		sd				0.0186733	0.00394785			sd				0.00669623	0.00147406
	6(DHA/EPA=1:1.5)	1	6.4	218.388	1032.97	0.0293057	0.0061957		6(DHA/EPA=1:1.5)	1	6.4	218.388	1032.97	0.029	0.006
		2	11			0.0503691	0.0106489			2	11
		3	9			0.0412111	0.0087127			3	9			0.041	0.009
		4	5.3			0.0242687	0.00513081			4	5.3			0.024	0.005
		5	5.5			0.0251846	0.00532443			5	5.5			0.025	0.005
		6	10.9			0.0499112	0.0105521			6	10.9			0.05	0.011
		7	3.7			0.0169423	0.00358189			7	3.7
		8	5.6			0.0256425	0.00542124			8	5.6			0.026	0.005
		9	7			0.0320531	0.00677655			9	7			0.032	0.007
		10	7.31			0.0334726	0.00707665			10	7.31			0.038	0.008
		11	8.2			0.0375479	0.00793824			11	8.2			0.036	0.008
		12	7.9			0.0361742	0.00764782			12	7.9
		mean				0.0335069	0.00708391			mean				0.0334444	0.00711111
		sd				0.00977598	0.0020668			sd				0.00813922	0.00196889
	7(DHA/EPA=1:3)	1	5.7	239.784	1134.18	0.0237714	0.00502567		7(DHA/EPA=1:3)	1	5.7	239.784	1134.18	0.024	0.005
		2	5			0.0208521	0.00440848			2	5			0.021	0.004
		3	3.3			0.0137624	0.0029096			3	3.3			0.014	0.003
		4	-2.5			-0.0104261	-0.00220424			4	-2.5			-0.01	-0.002
		5	-5			-0.0208521	-0.00440848			5	-5
		6	1			0.00417043	0.000881697			6	1			0.00417043	0.000881697
		7	-5.4			-0.0225203	-0.00476116			7	-5.4
		8	5.5			0.0229373	0.00484933			8	5.5			0.023	0.005
		9	10.3			0.0429554	0.00908148			9	10.3			0.043	0.009
		10	0.6			0.00250226	0.000529018			10	0.6			0.003	0.001
		11	11.5			0.0479599	0.0101395			11	11.5
		12	3.6			0.0150135	0.00317411			12	3.6			0.015	0.003
		mean				0.0116772	0.00246875			mean				0.0152412	0.00320908
		sd				0.0214558	0.0045361			sd				0.014344	0.00294569

[truncated: 16 more sheets: Fig3F-G, Fig4A-B, Fig4C-D, Fig4E-H, Fig5A-E, Fig5G, Fig6A, Fig6B, Fig6C, Fig6D-E, Fig6F, Fig6G-MDA, Fig6H-I, Fig7B, Fig8A-E, FigF-G]
